# Supplementary material
Source: PubMed Central journal article supplement (PMC7017721)
Supplement: NIHMS1066663-supplement-Supplementary_Table_2.pdf [file NIHMS1066663-supplement-Supplementary_Table_2.pdf]

Supplementary table 2: Overall sociodemographic and clinical characteristics of 7,989 CaPSURE participants with PCa and univariate analysis comparing characteristics between CAM users versus non-users.

| <b>Characteristics</b>                          | <b>All Participants:</b> | <b>CAM non-user:</b> | <b>CAM user:</b> | <b>P-value</b> |
|-------------------------------------------------|--------------------------|----------------------|------------------|----------------|
| <b>All participants n (%)</b>                   | 7989 (100)               | 3484 (44)            | 4505 (56)        |                |
| <b>Age at diagnosis (mean ± SD)</b>             | 66±9                     | 66±9                 | 65±8             | <0.01          |
| <b>Race/ethnicity n (%)</b>                     |                          |                      |                  |                |
| White                                           | 7226 (90)                | 3022 (87)            | 4204 (93)        | <0.01          |
| Black                                           | 551 (7)                  | 355 (10)             | 196 (4)          |                |
| Latino                                          | 90 (1)                   | 50 (1)               | 40 (1)           |                |
| Other                                           | 122 (2)                  | 57 (2)               | 65 (1)           |                |
| <b>Education level n (%)</b>                    |                          |                      |                  |                |
| High school                                     | 2605 (33)                | 1421 (41)            | 1184 (26)        | <0.01          |
| College                                         | 4373 (55)                | 1505 (43)            | 2868 (64)        |                |
| Unknown                                         | 1011 (13)                | 558 (16)             | 453 (10)         |                |
| <b>Income category in \$/year n (%)</b>         |                          |                      |                  |                |
| <30,000                                         | 1676 (21)                | 909 (26)             | 767 (17)         | <0.01          |
| 30,000 to <50,000                               | 1451 (18)                | 575 (17)             | 876 (19)         |                |
| 50,000 to <75,000                               | 1266 (16)                | 480 (14)             | 786 (17)         |                |
| ≥75,000                                         | 1930 (24)                | 613 (18)             | 1317 (29)        |                |
| Unknown                                         | 1666 (21)                | 907 (26)             | 759 (17)         |                |
| <b>Insurance type n (%)</b>                     |                          |                      |                  |                |
| Medicare                                        | 7351 (92)                | 3184 (91)            | 4167 (93)        | 0.18           |
| Private                                         | 261 (3)                  | 125 (4)              | 136 (3)          |                |
| Other/unknown                                   | 377 (5)                  | 175 (5)              | 202 (5)          |                |
| <b>Study site n (%)</b>                         |                          |                      |                  |                |
| Academic                                        | 628 (8)                  | 189 (5)              | 439 (10)         | <0.01          |
| Community                                       | 7112 (89)                | 3175 (91)            | 3937 (87)        |                |
| Veterans                                        | 249 (3)                  | 120 (3)              | 129 (3)          |                |
| <b>Study region n (%)</b>                       |                          |                      |                  |                |
| West                                            | 1277 (16)                | 456 (13)             | 821 (18)         | <0.01          |
| East                                            | 3298 (41)                | 1516 (44)            | 1782 (40)        |                |
| Midwest                                         | 2247 (28)                | 915 (26)             | 1332 (30)        |                |
| South                                           | 1167 (15)                | 597 (17)             | 570 (13)         |                |
| <b>Gleason grade at diagnostic biopsy n (%)</b> |                          |                      |                  |                |
| 2 to 6                                          | 4792 (60)                | 2083 (60)            | 2709 (60)        | 0.12           |
| 7 (3+4)                                         | 1430 (18)                | 594 (17)             | 836 (19)         |                |
| 7 (4+3) or 8 to 10                              | 1565 (20)                | 718 (21)             | 847 (19)         |                |
| Missing                                         | 202 (3)                  | 89 (3)               | 113 (3)          |                |
| <b>Clinical T-stage</b>                         |                          |                      |                  |                |
| T1                                              | 4196 (53)                | 1752 (50)            | 2444 (54)        | <0.01          |
| T2                                              | 3096 (39)                | 1418 (41)            | 1678 (37)        |                |
| T3                                              | 194 (2)                  | 105 (3)              | 89 (2)           |                |
| T4                                              | 13 (0.2)                 | 8 (0.2)              | 5 (0.1)          |                |
| Missing                                         | 490 (6)                  | 201 (6)              | 289 (6)          |                |
| <b>PSA at diagnosis in ng/ml</b>                | 6.0 (4.5 - 9.0)          | 6.2 (4.7 – 10.1)     | 5.8 (4.4 – 8.4)  | <0.01          |

| <b>Characteristics</b>                                                                              | <b>All Participants:</b> | <b>CAM non-user:</b> | <b>CAM user:</b>   | <b>P-value</b> |
|-----------------------------------------------------------------------------------------------------|--------------------------|----------------------|--------------------|----------------|
| <b>median (SD)</b>                                                                                  |                          |                      |                    |                |
| <b>BMI at diagnosis in kg/m<sup>2</sup> median (IQR)</b>                                            | 26.9 (24.7 - 29.7)       | 27.0 (24.8 - 29.7)   | 26.7 (24.7 - 29.6) | 0.21           |
| <b>Comorbidities at diagnosis n ± SD</b>                                                            | 1.9 ± 1.4                | 1.8 ± 1.4            | 2.0 ± 1.5          | <0.01          |
| <b>Primary treatment n (%)</b>                                                                      |                          |                      |                    |                |
| Radical prostatectomy                                                                               | 4036 (51)                | 1665 (48)            | 2371 (53)          | <0.01          |
| Cryotherapy                                                                                         | 275 (3)                  | 111 (3)              | 164 (4)            |                |
| Brachytherapy                                                                                       | 1090 (14)                | 486 (14)             | 604 (13)           |                |
| Radiation therapy                                                                                   | 650 (8)                  | 309 (9)              | 341 (8)            |                |
| Androgen deprivation therapy                                                                        | 935 (12)                 | 488 (14)             | 447 (10)           |                |
| Chemotherapy                                                                                        | 8 (0.1)                  | 3 (0.1)              | 5 (0.1)            |                |
| Non-invasive management                                                                             | 995 (13)                 | 422 (12)             | 573 (13)           |                |
| <b>Study participation (i.e., time from diagnosis to final questionnaire) in years median (IQR)</b> | 4.3 (1.8 – 9.8)          | 2.2 (1.1 – 4.5)      | 7.0 (3.5 – 12.0)   | <0.01          |
